# Supplementary material for: Synthesis, Characterization, Antioxidant, and Anticancer Activity against Colon Cancer Cells of Some Cinnamaldehyde-Based Chalcone Derivatives
Source: MDPI journal article supplement (doi:10.3390/biom14020216), 2024-02-12

**Synthesis, characterization, antioxidant and anticancer activity against colon cancer cells of some cinnamaldehyde-based chalcone derivatives**

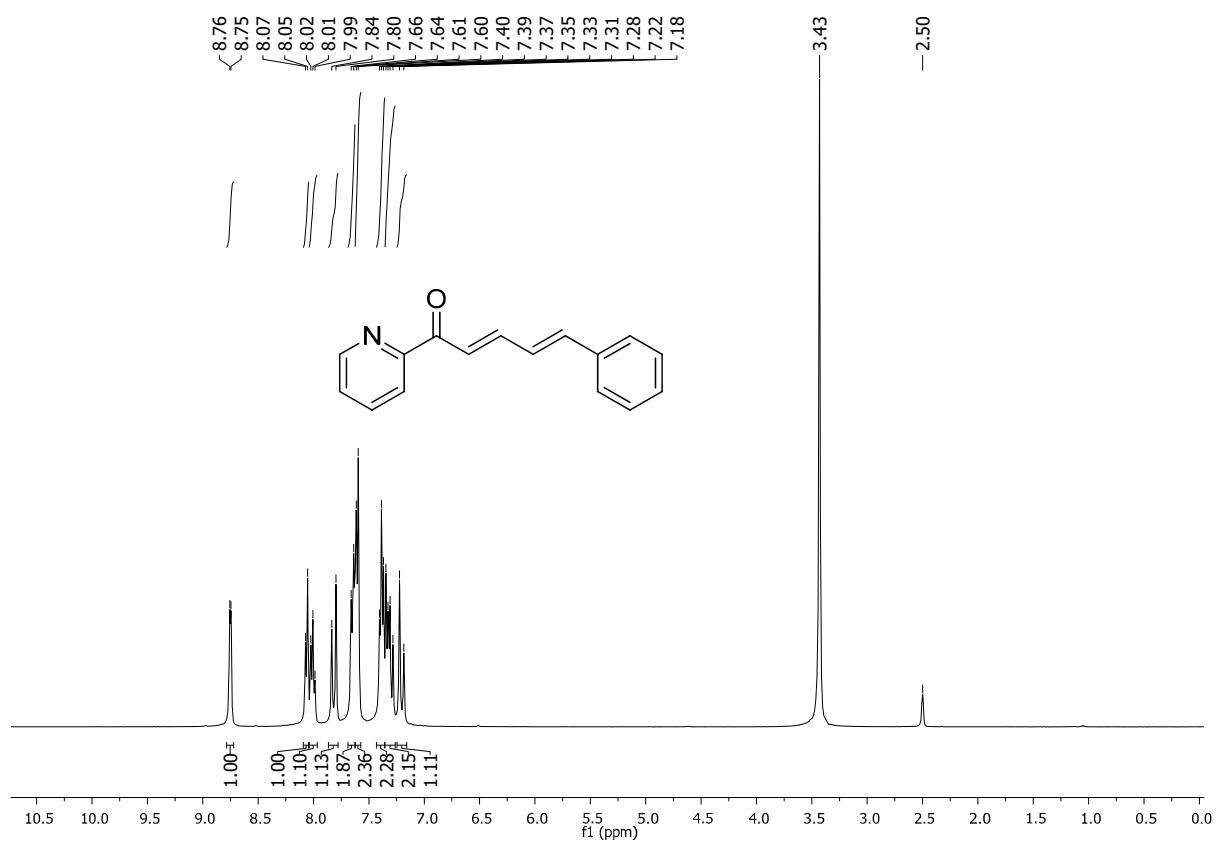

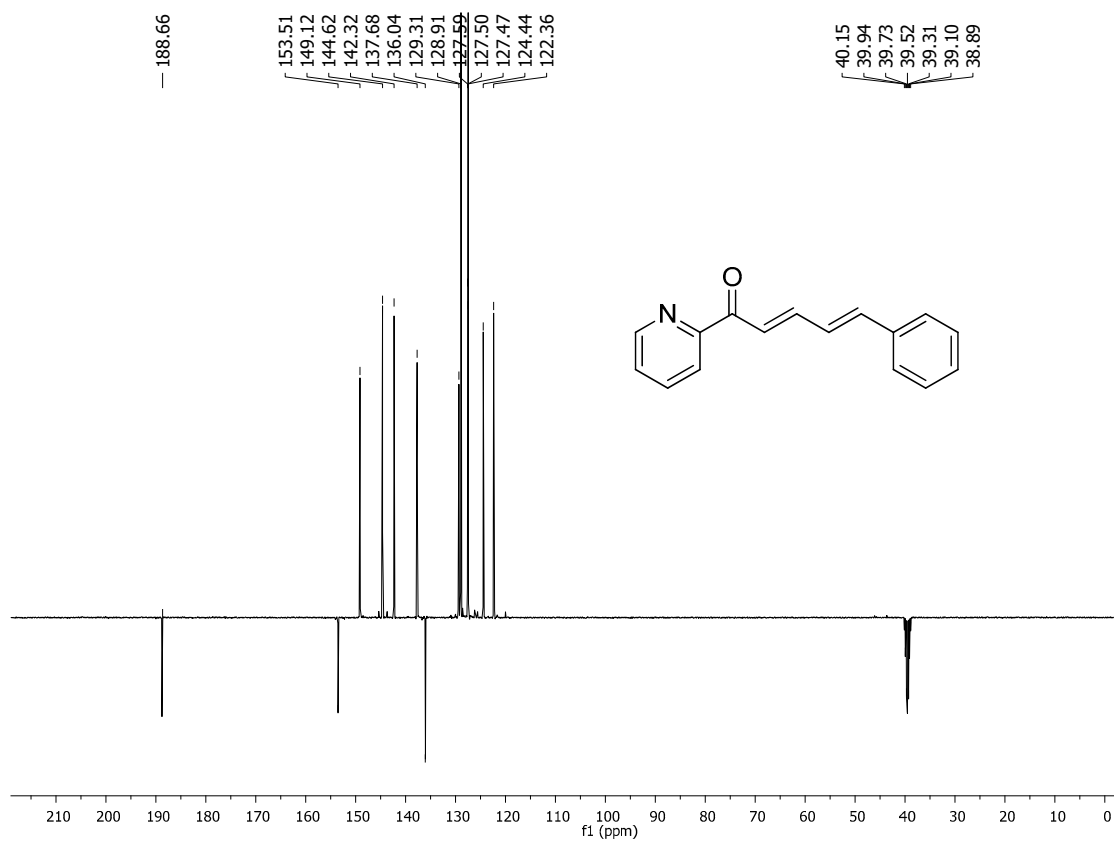

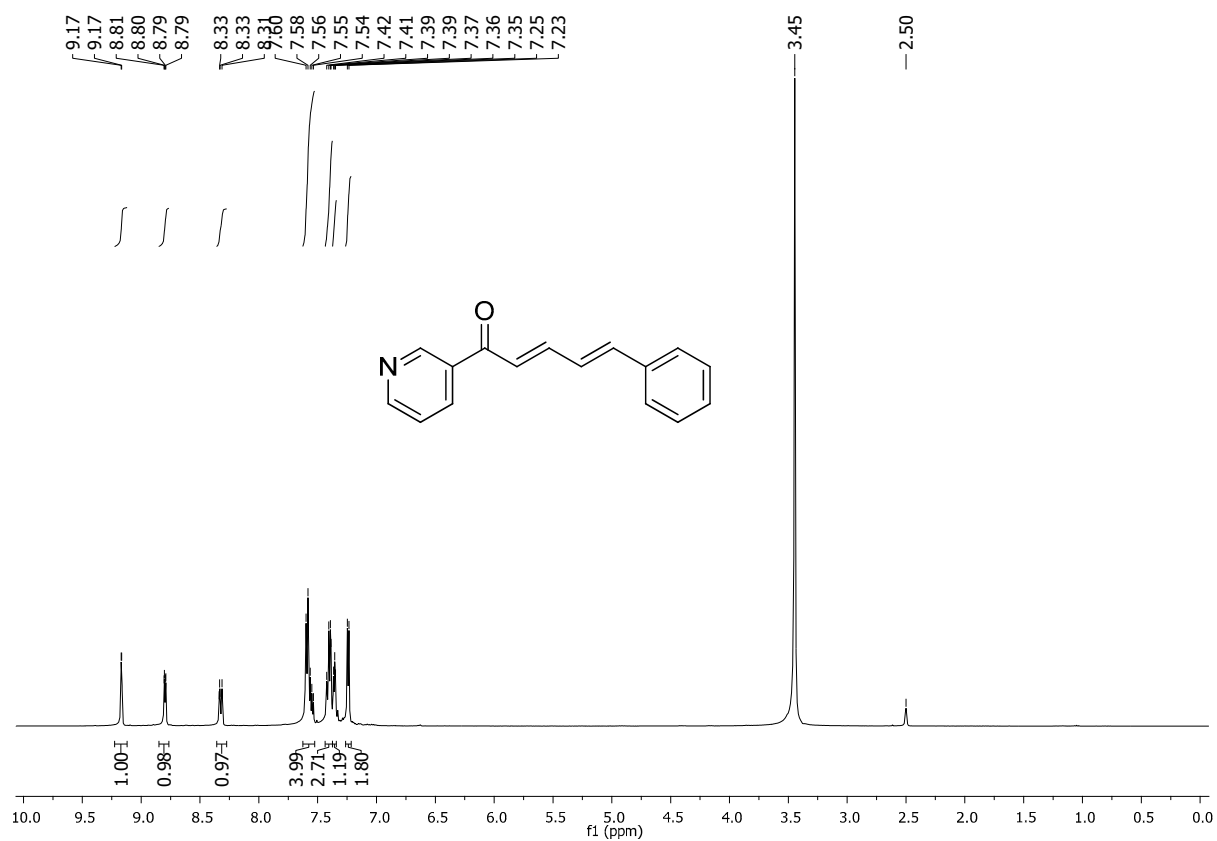

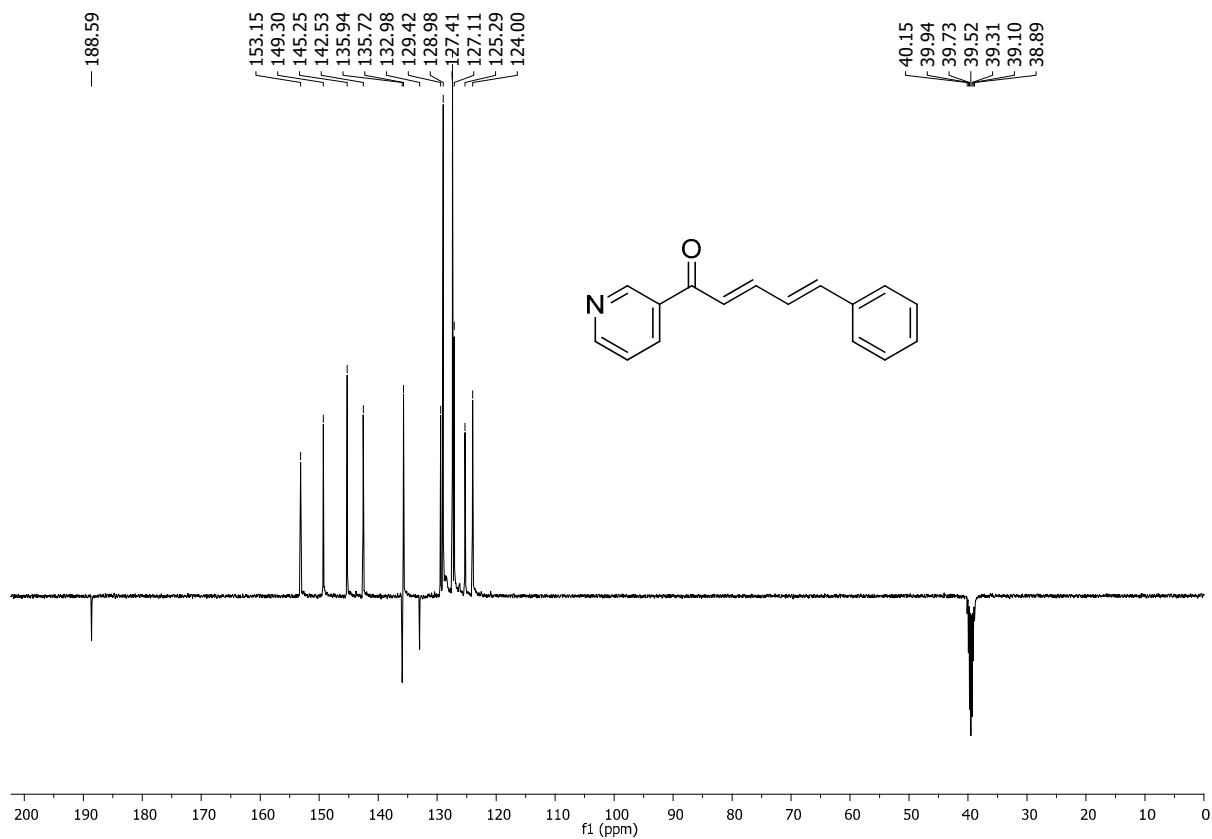

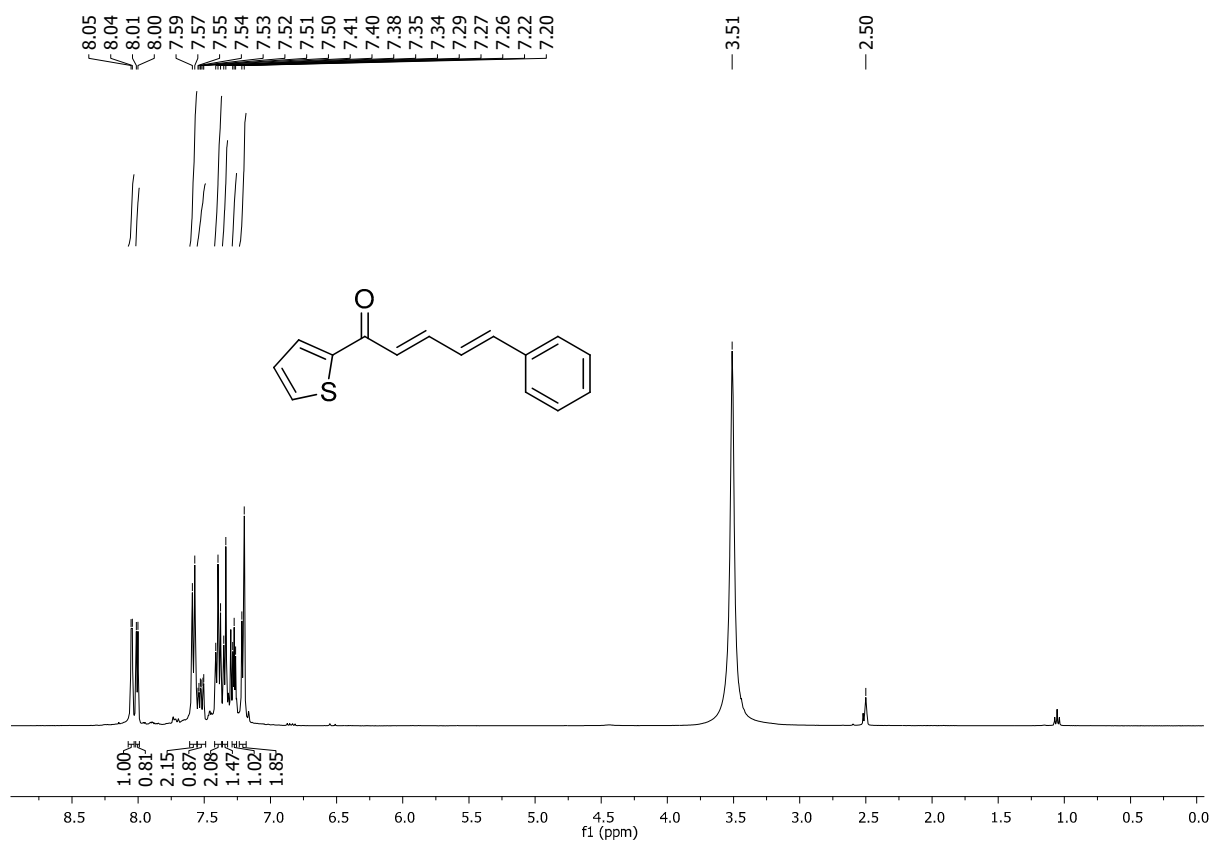

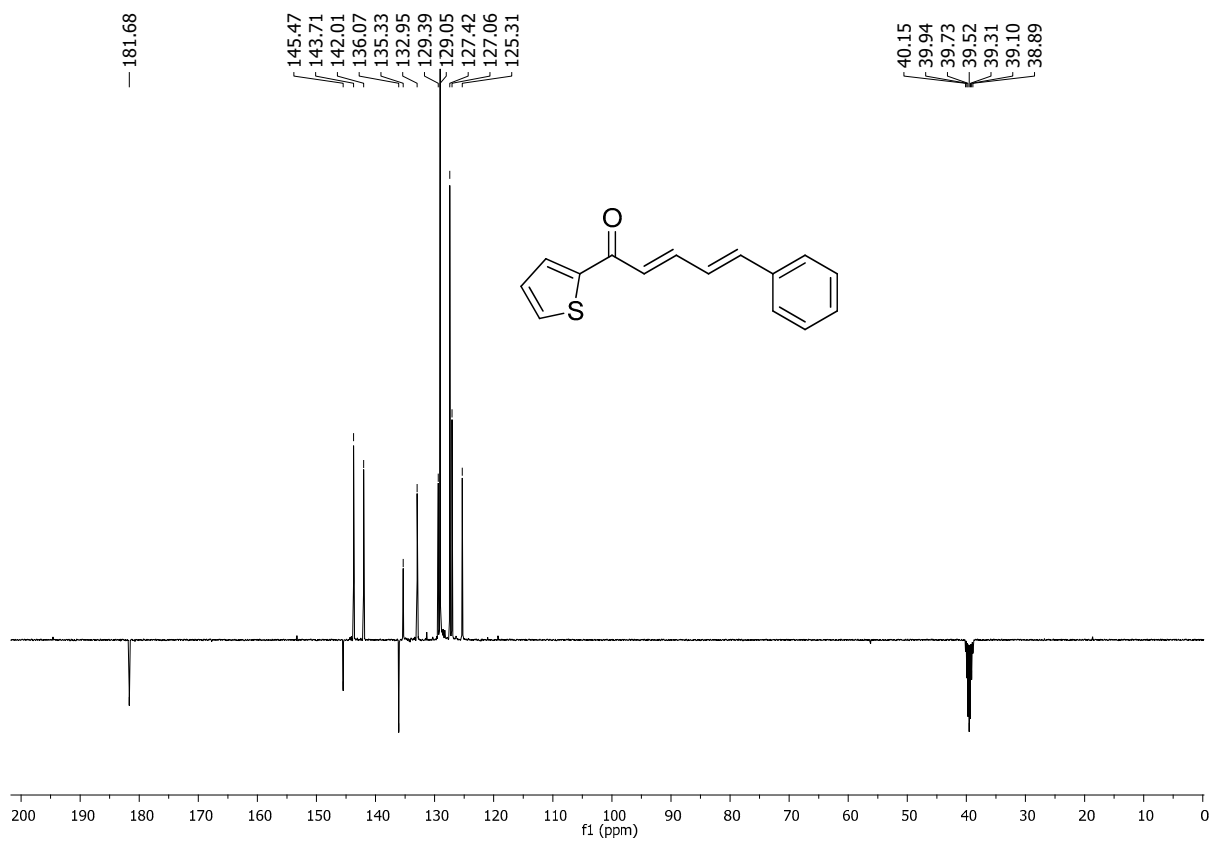

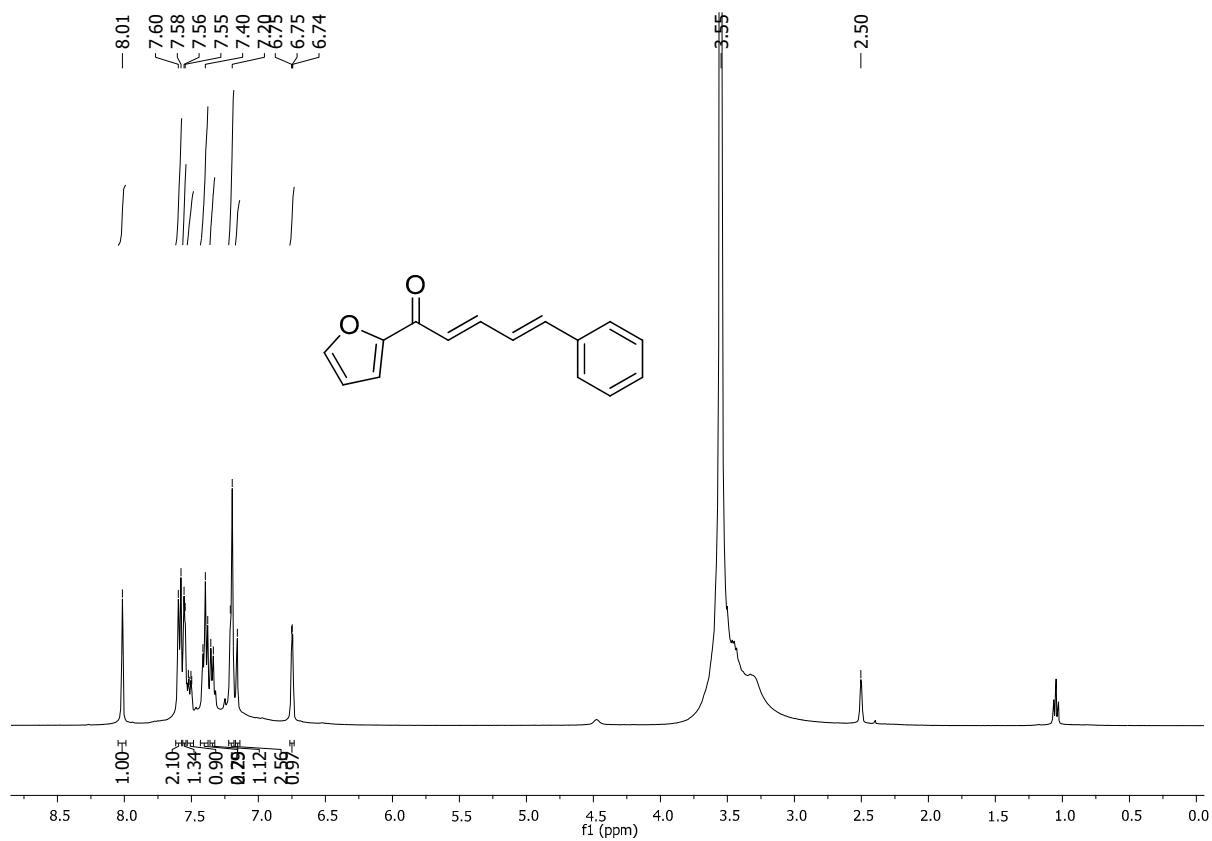

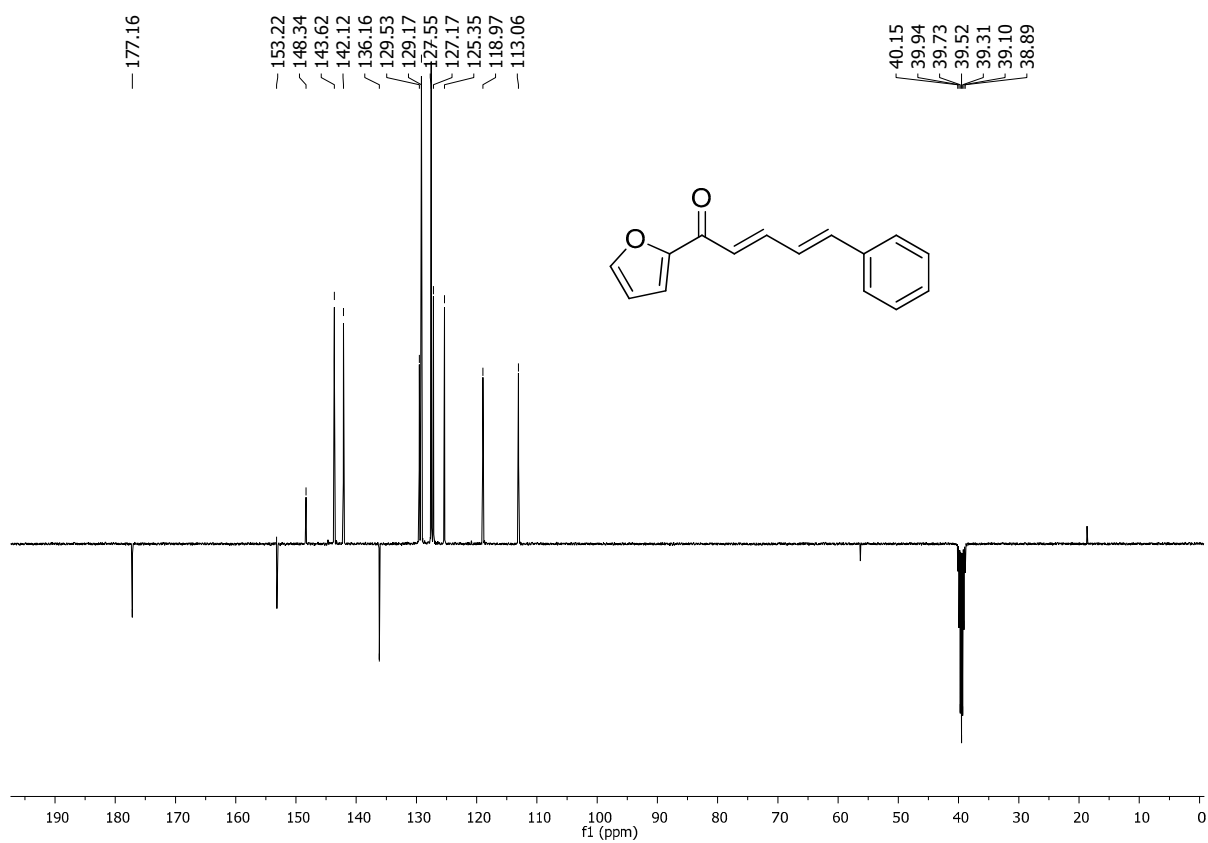



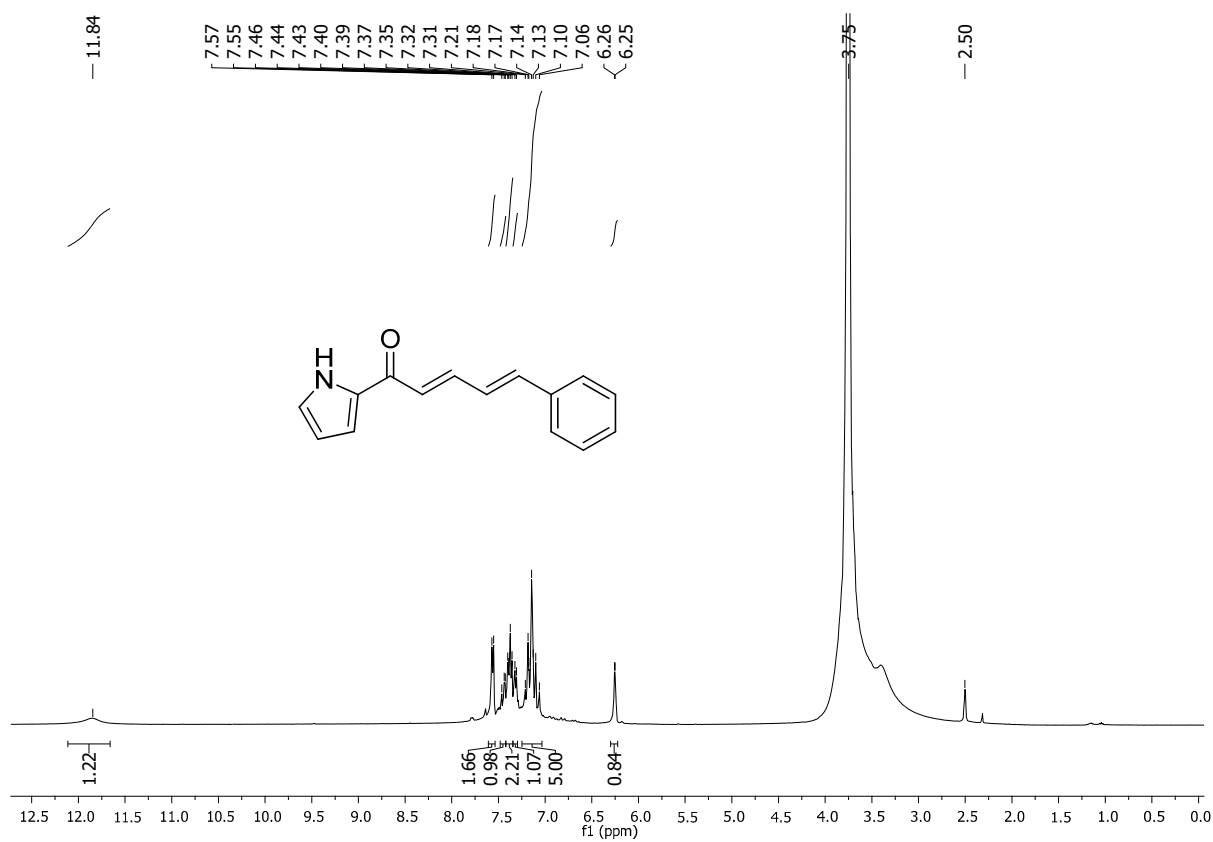

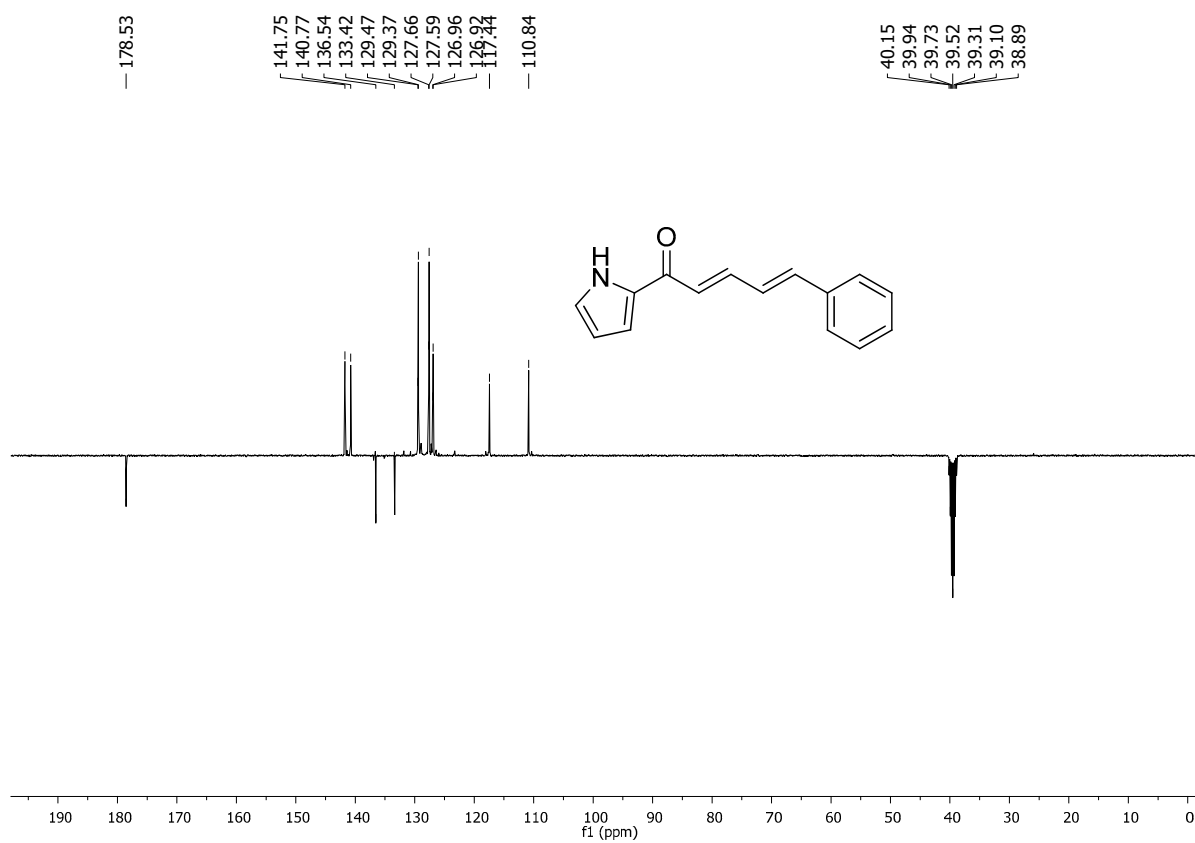

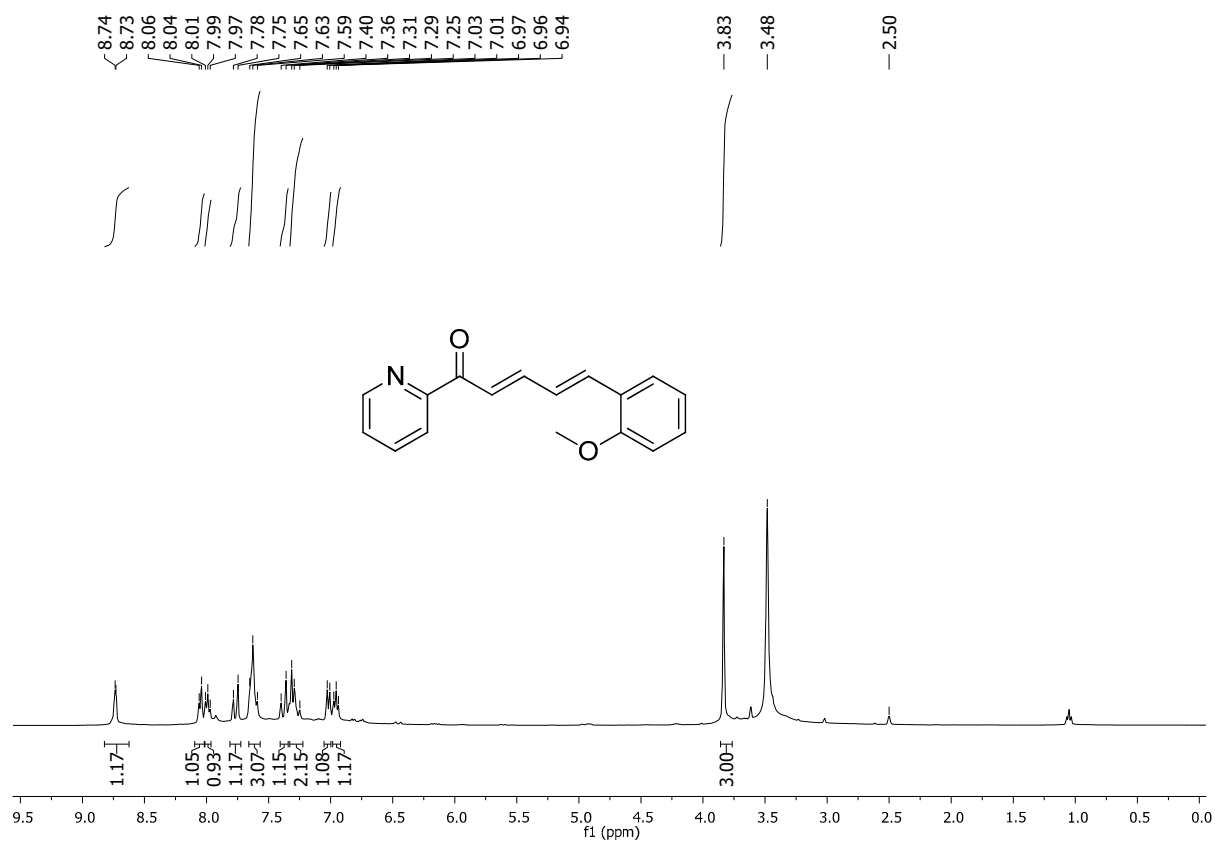

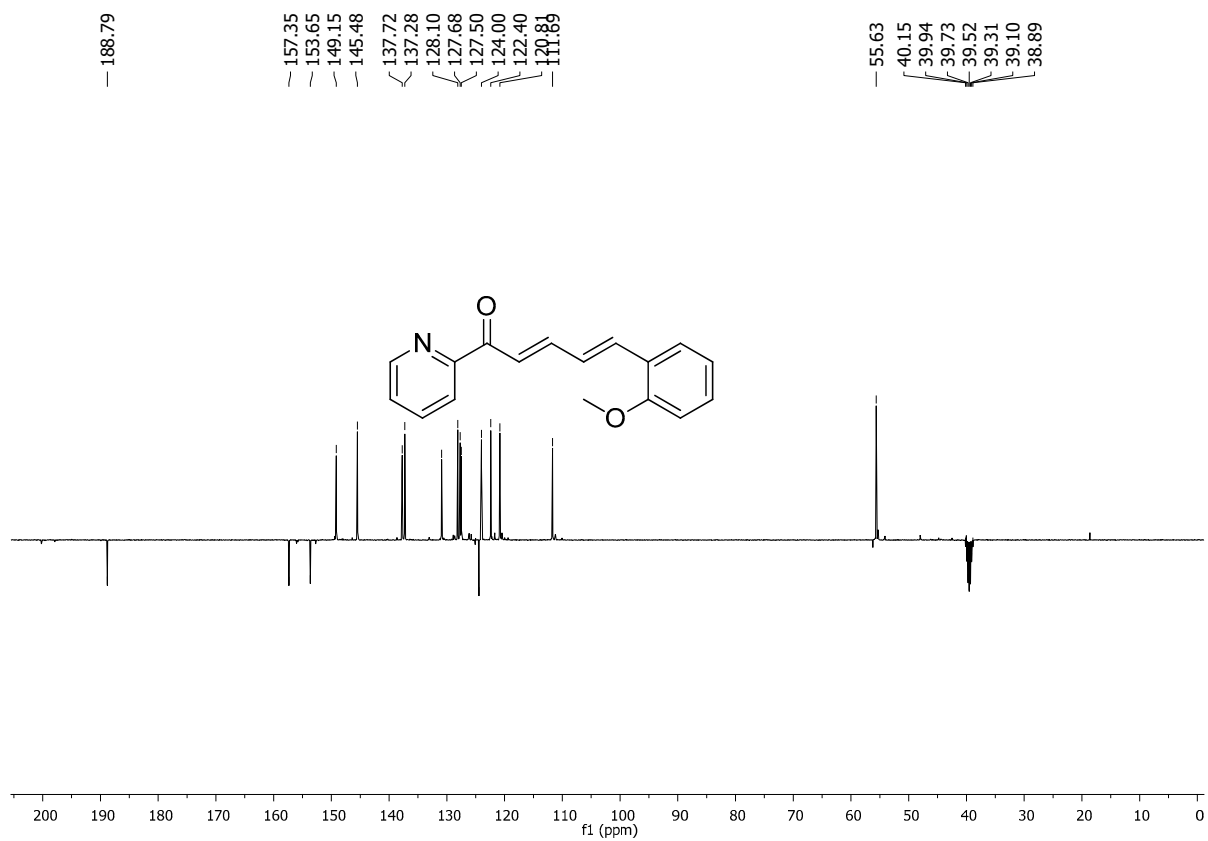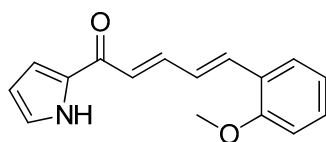

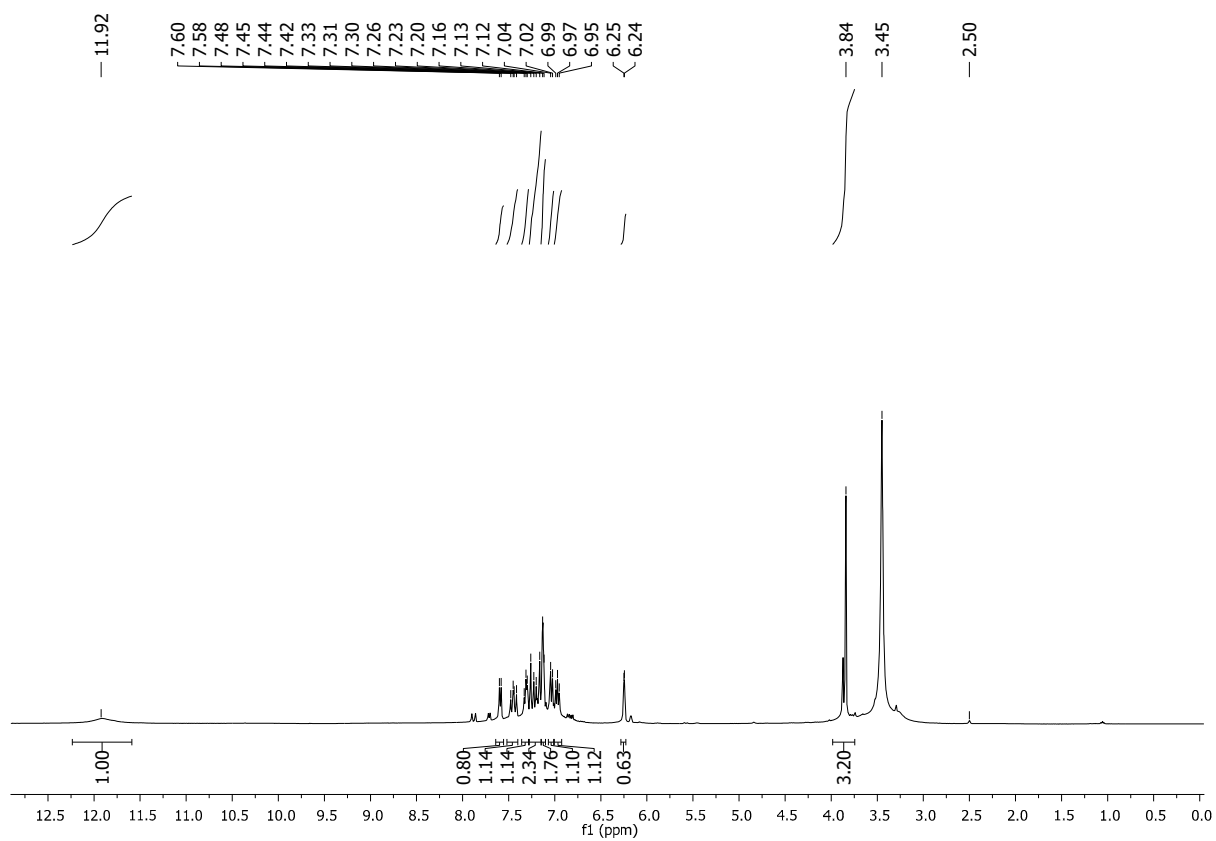

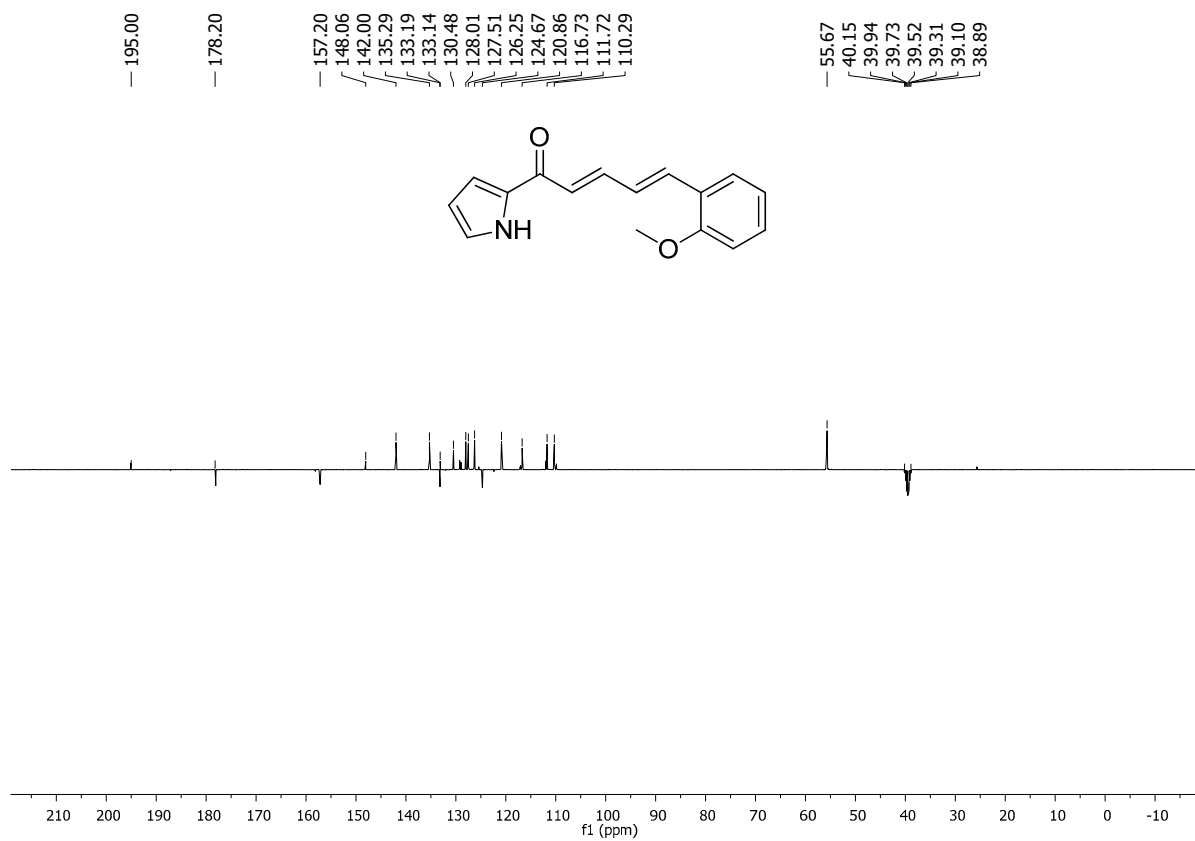

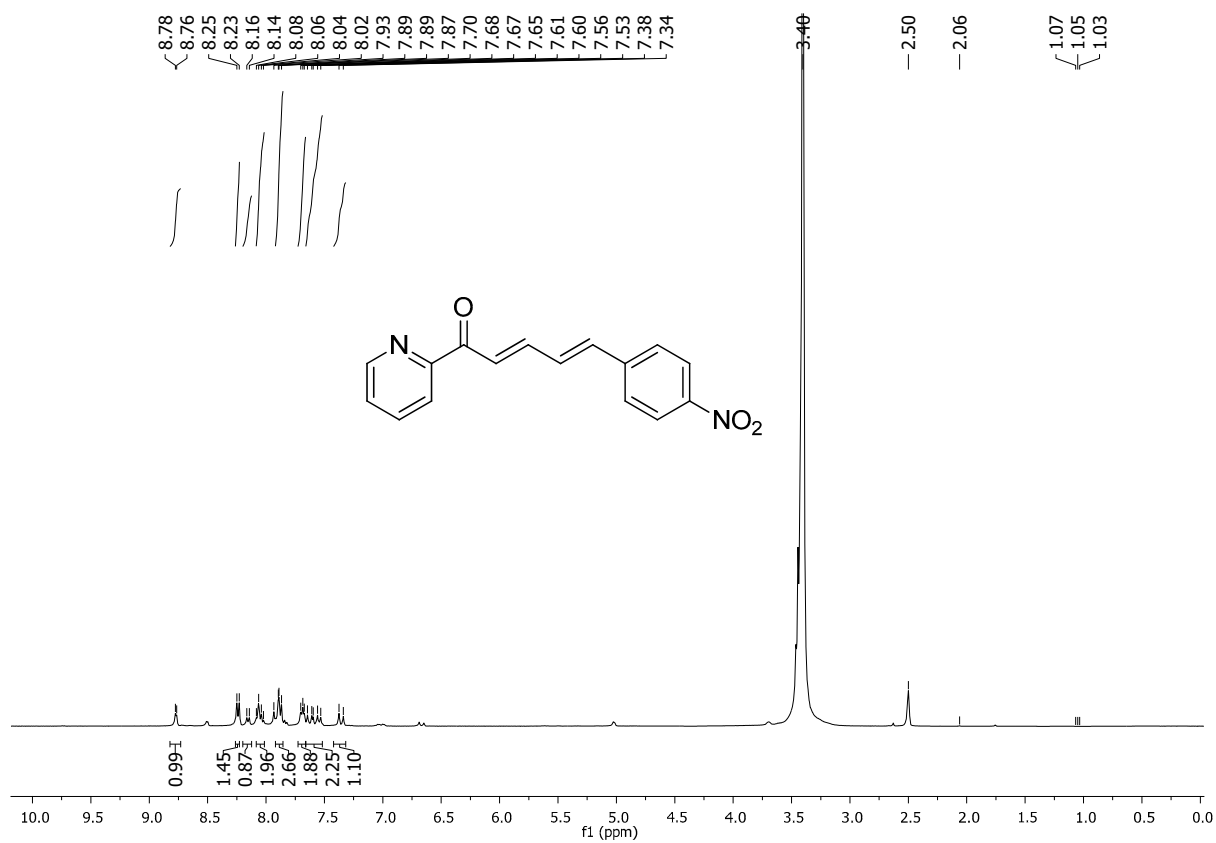

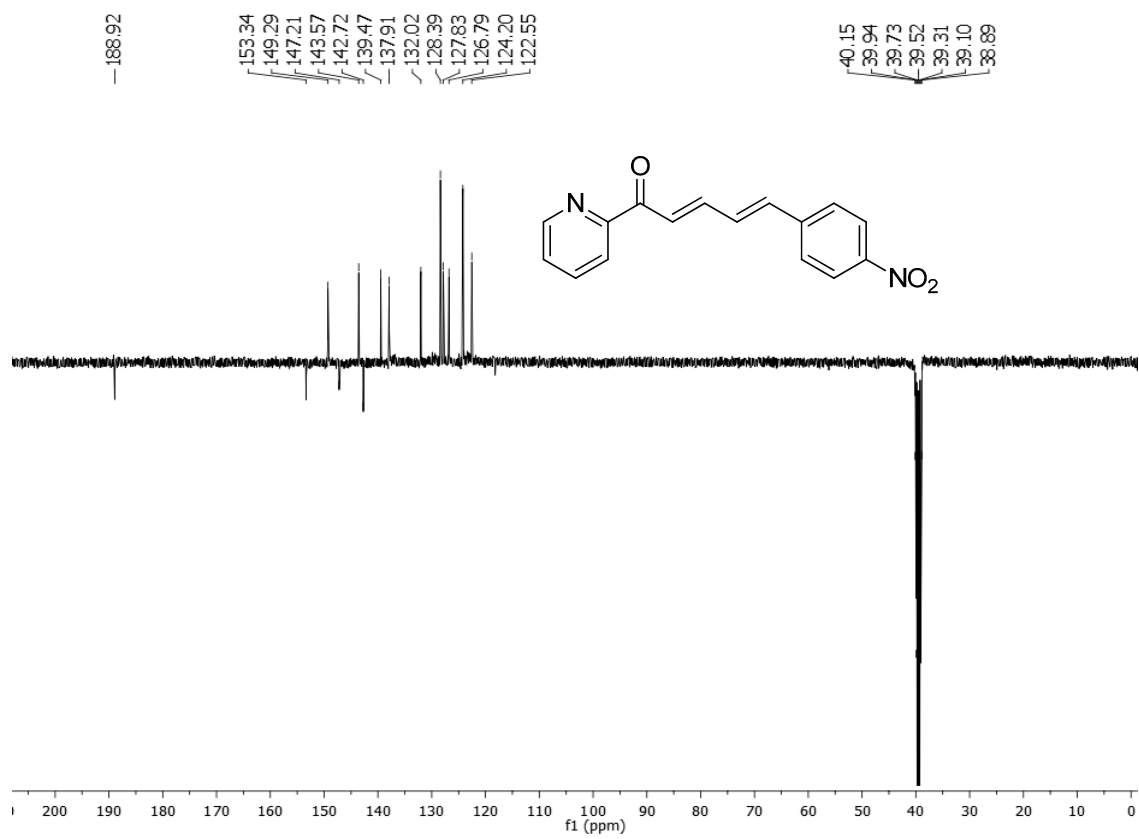



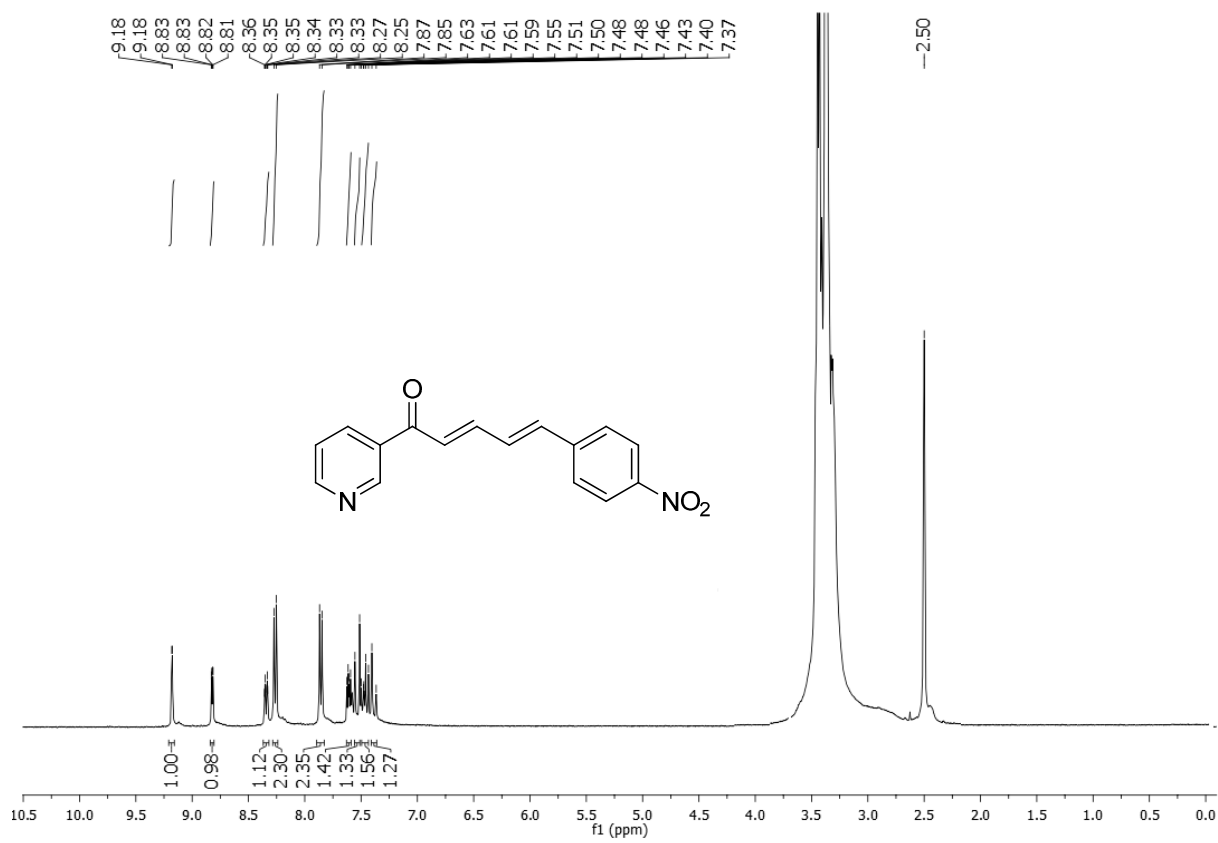

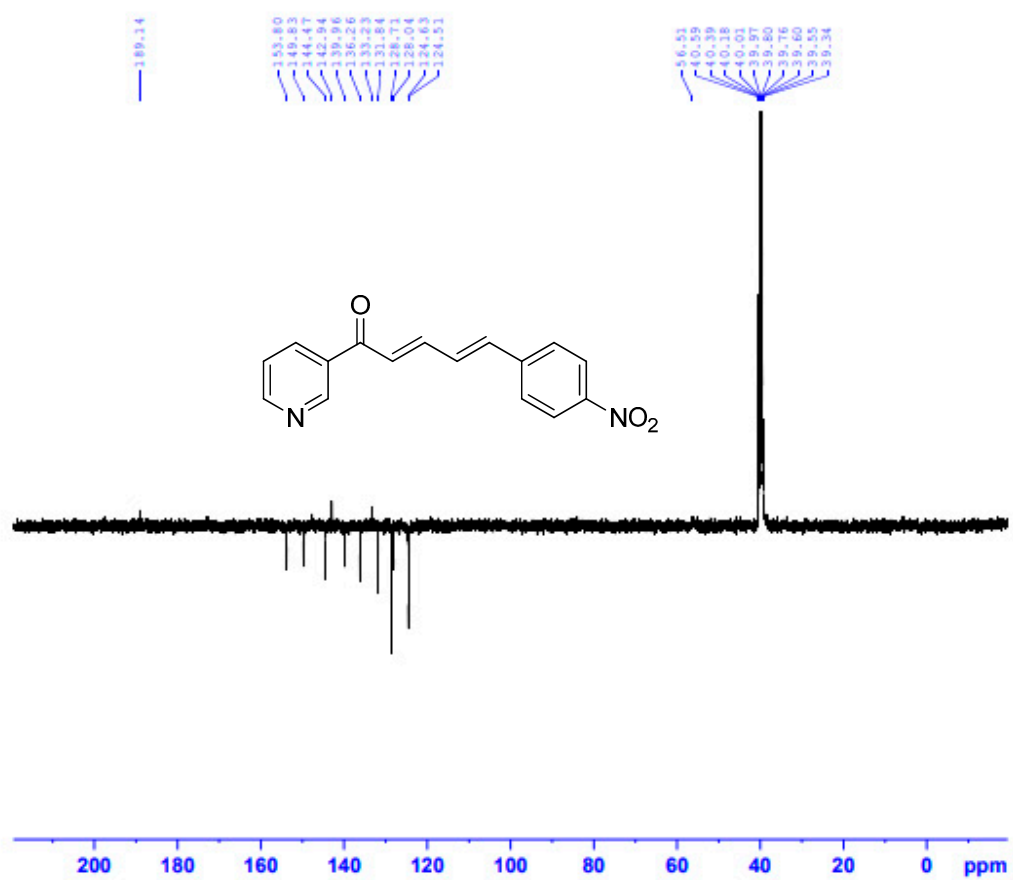

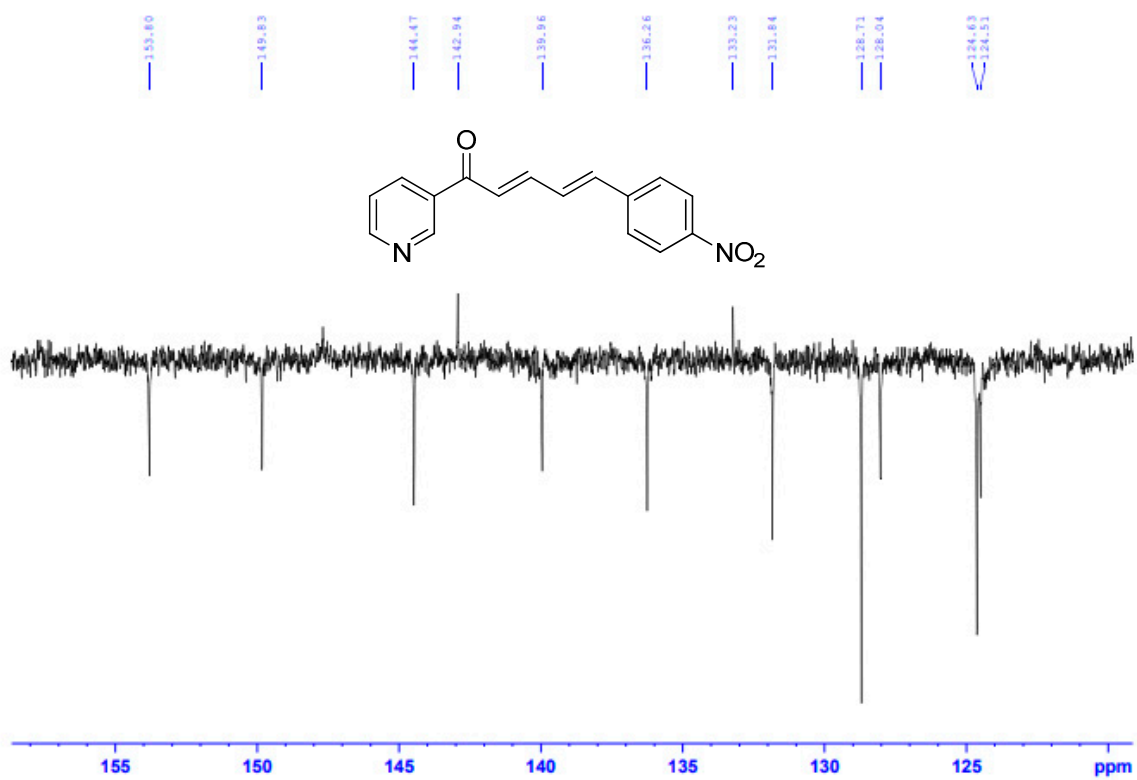

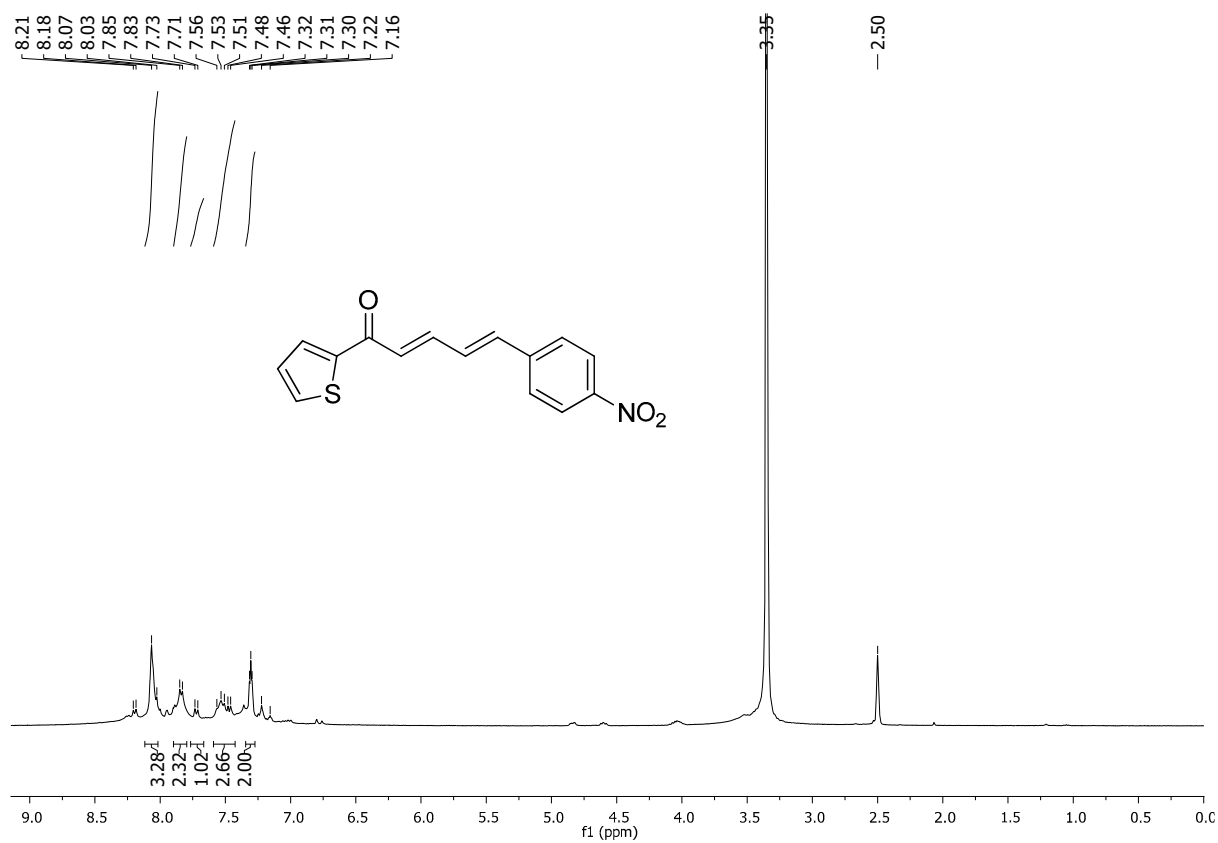

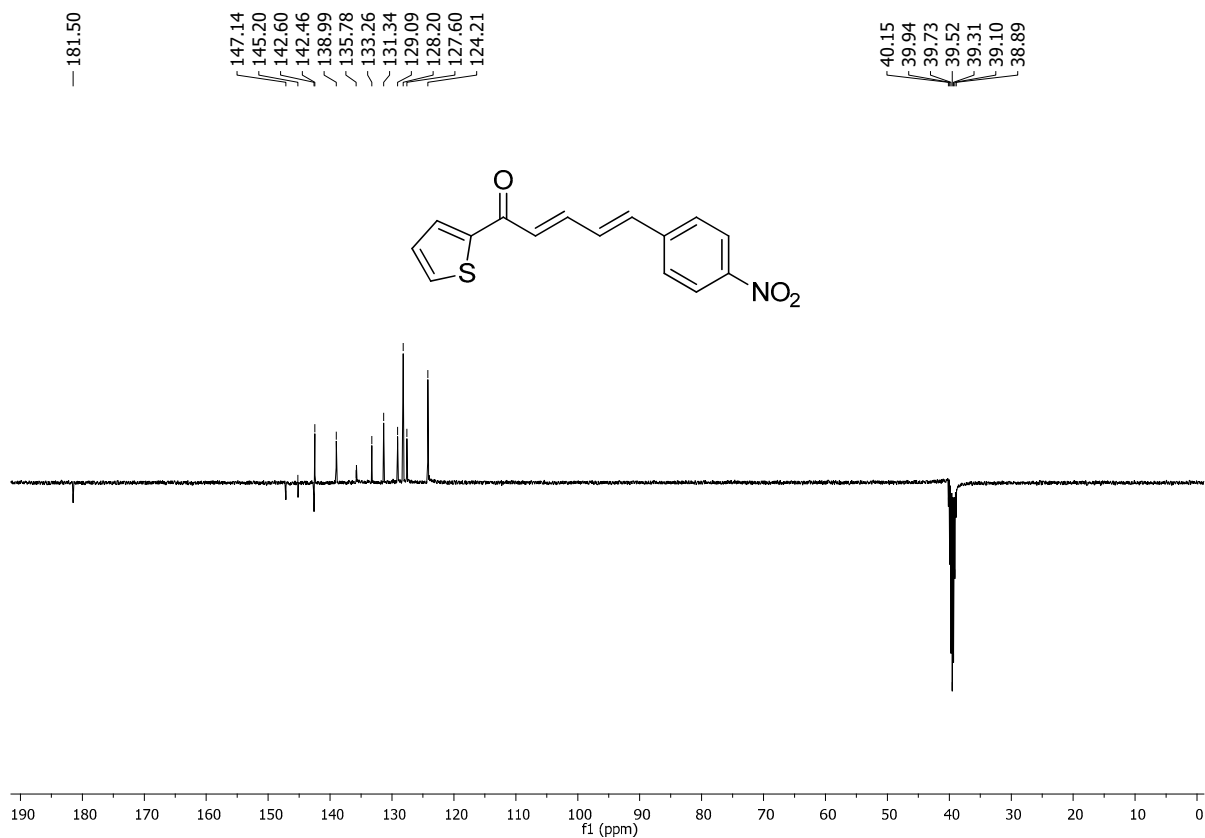

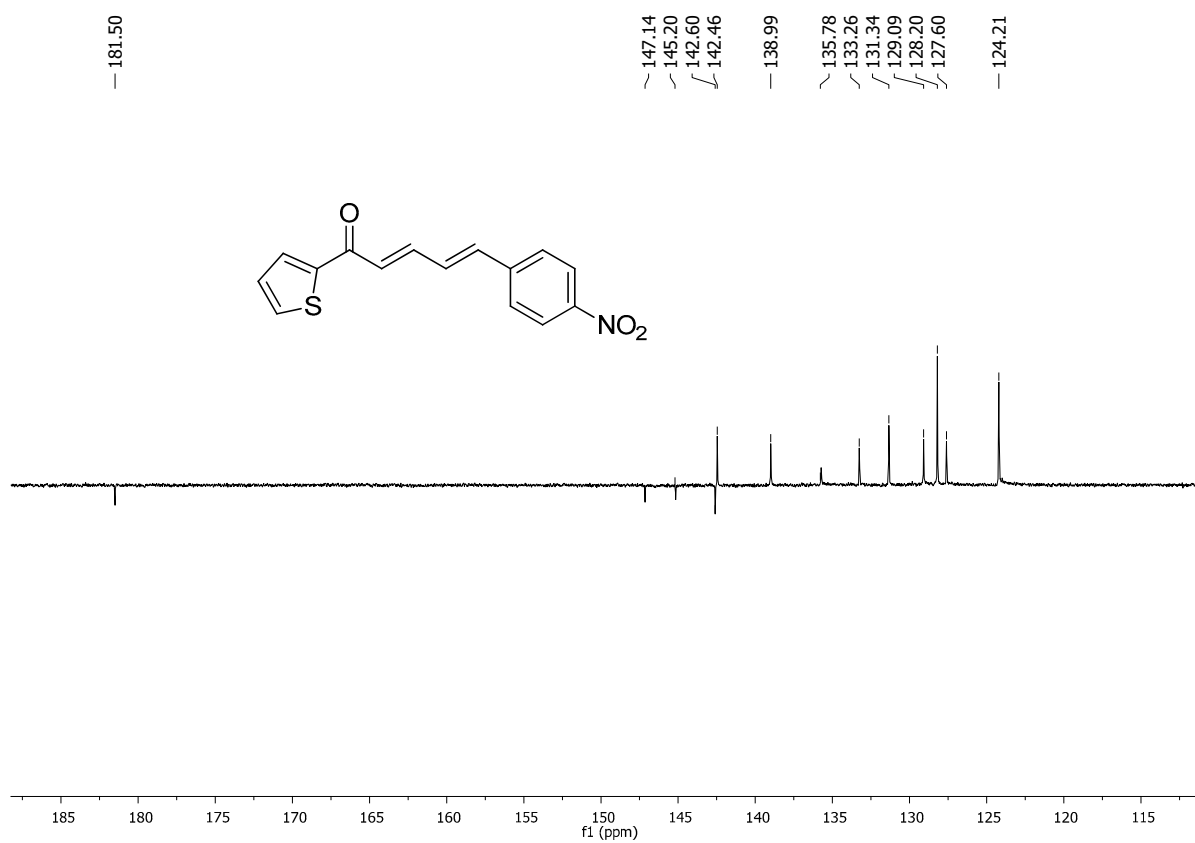

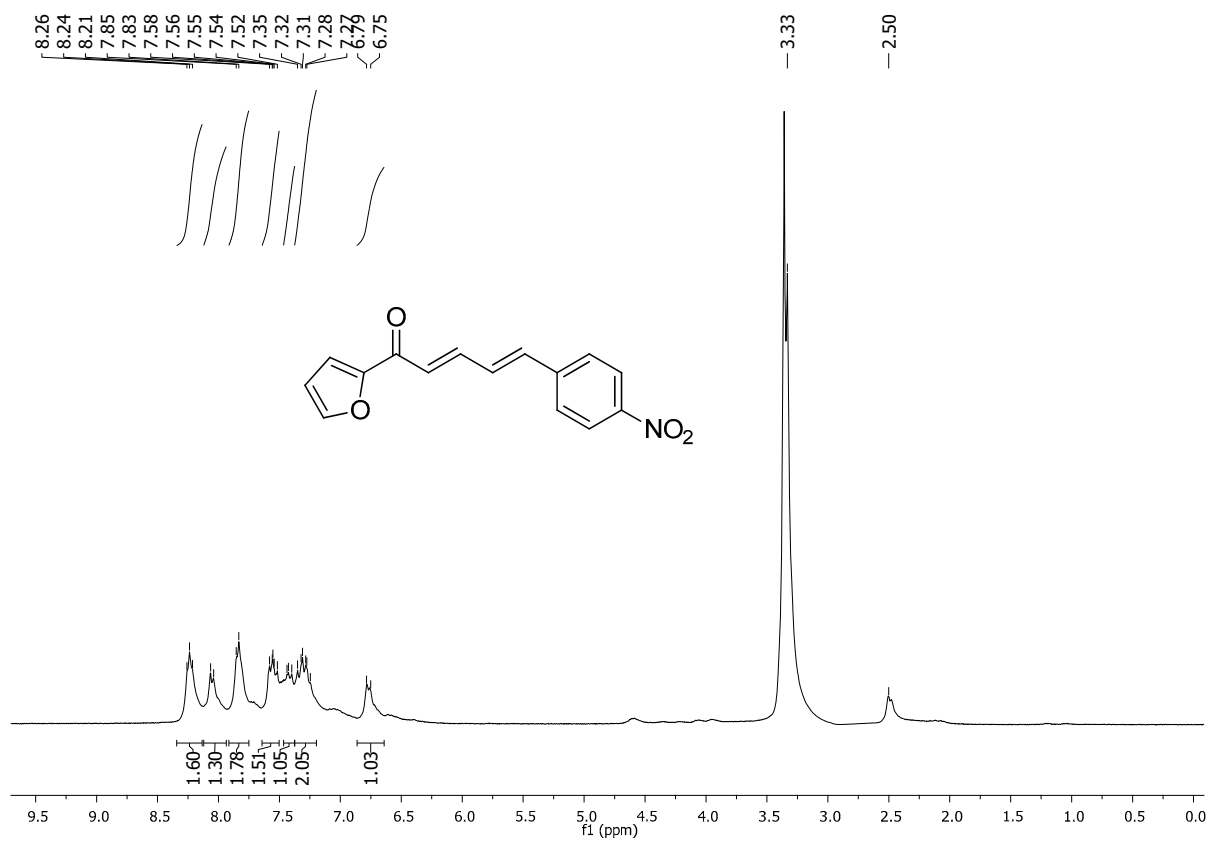

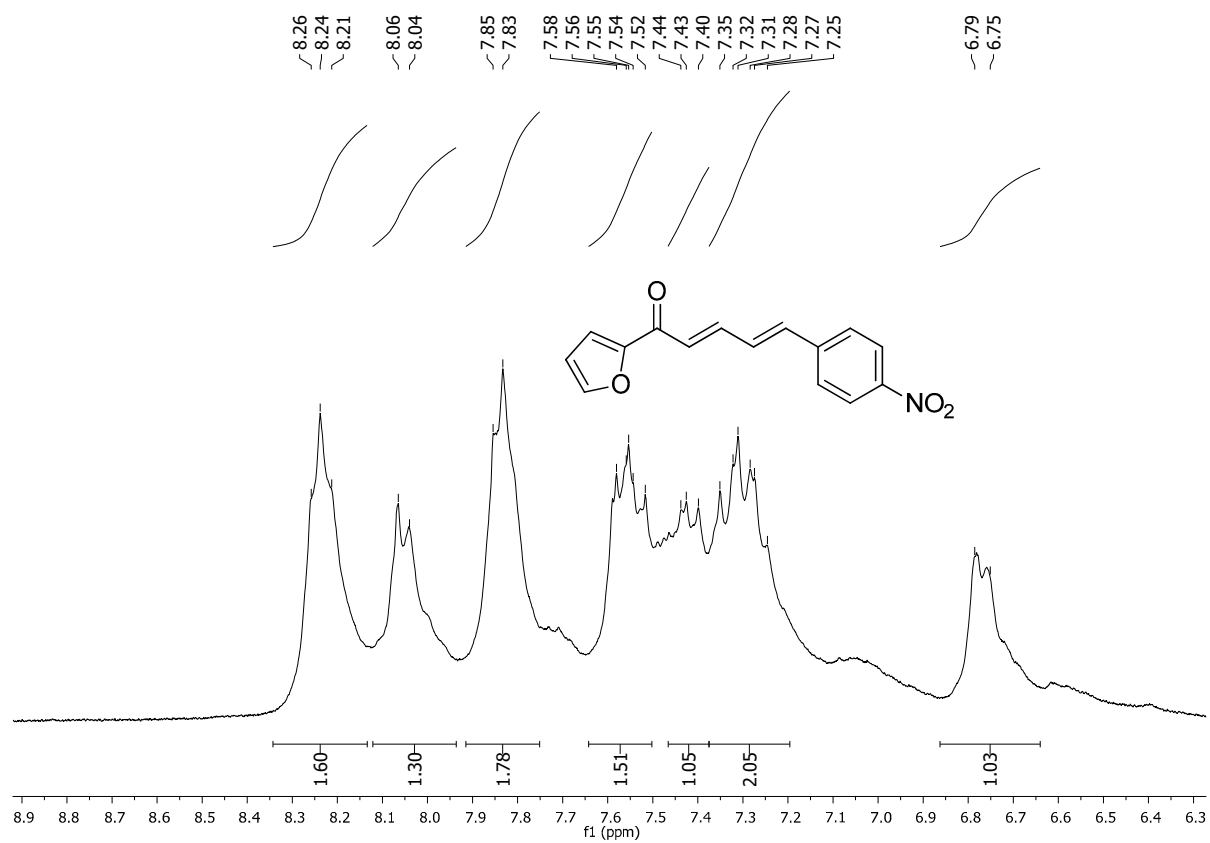



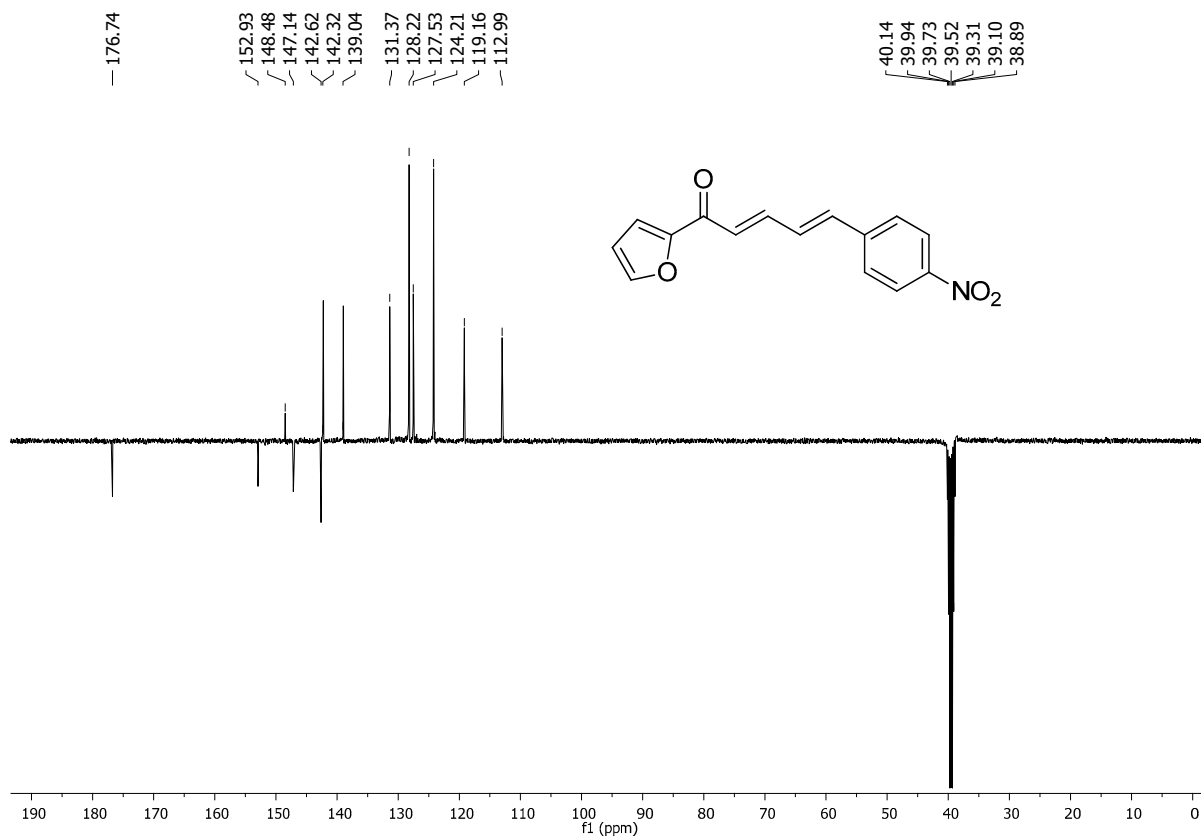

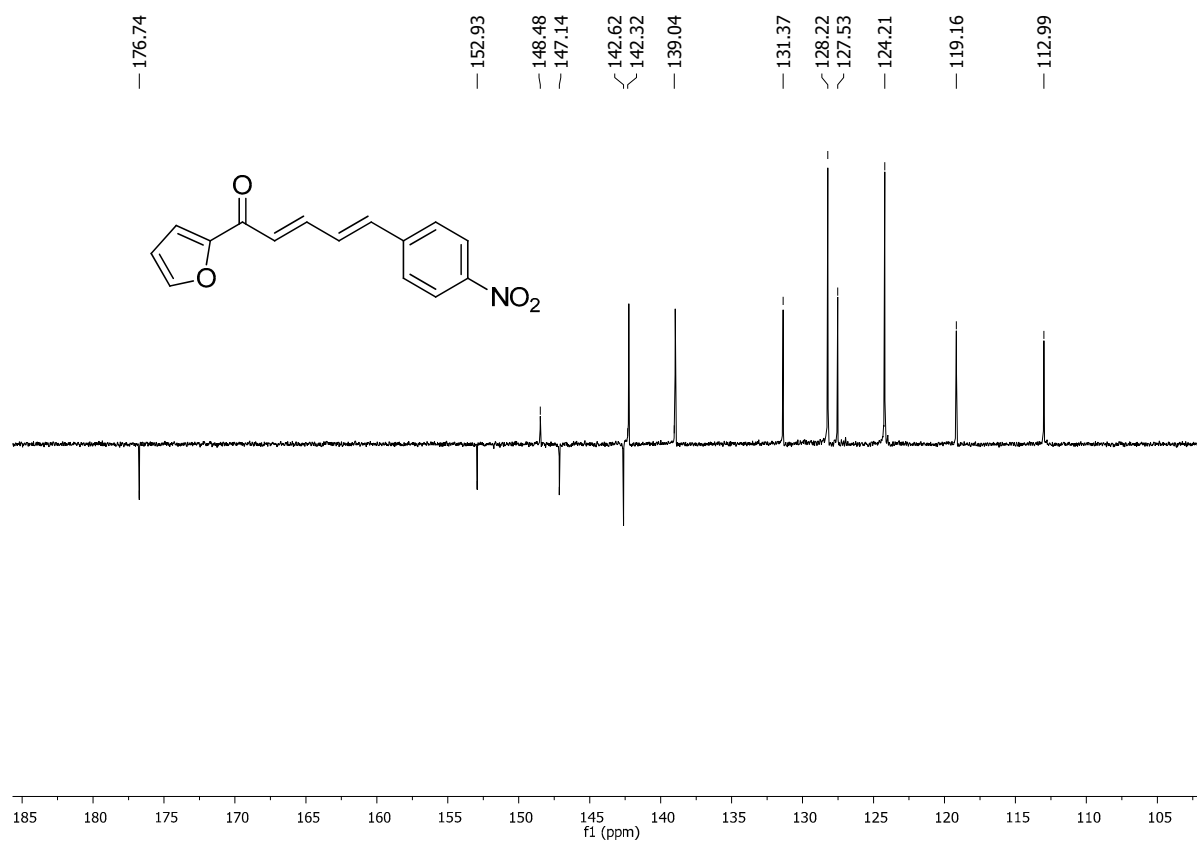

Supplement: s1 [file s1]
